# Supplementary material for: Unexpected binding behaviors of bacterial Argonautes in human cells cast doubts on their use as targetable gene regulators
Source: PubMed Central journal article supplement (PMC5870970; doi:10.1371/journal.pone.0193818), 2018-03-27
Supplement: pone.0193818.s001.pdf [file pone.0193818.s001.pdf]

## O'Geen, S1 Fig

### hNgAgo

NLS (SV40): aa 2-9

3X Flag: aa 15-36

hNgAgo: aa 65-764

NLS (Neoplasmin): aa 977-992

P2A cleavage peptide: aa 999-1017

MPKKKRKVGSGGSDYKDHDGDYKDHDIDYKDDDDKGGGSGGSGTGGSGGSGGSGGSGGSGRPMTVIDLDSSTTTADE  
LTSGHTYDISVTLTGVIYDNTDEQHPRMSLAFEQDNGERRYITLWKNTPKDVFTYDYATGSTYIFTNIDYEVKDGyen  
LTATYQTTVENATAQEVGTTDEDETFAGGEPLDHHLDDALNETPDDAETESDSGHVMTSFASRDQLPEWTLHTYTLTA  
TDGAKTDTEYARRTLAYTVRQELYTDHDAAPVATDGLMLLTPEPLGETPLDLDCGVRVEADETRTLDYTTAKDRLLAR  
ELVEEGLKRSLWDDYLVRGIDEVLSKEPVLTCDEFDLHERYDLSVEVGHSGRAYLHINFRHRFVPKLTLADIDDDNIY  
PGLRVKTTYRPRRGHIVWGLRDECATDSLNTLGNQSVVAYHRNNOPTINTDLLDAIEAADRRVETRRQGHGDDAVSF  
PQELLAVEPNTHQIKQFASDGFHQQARSKTRLSASRCSEKAQAFERLDPVRLNGSTVEFSSEFFFTGNNEQQLRLLYE  
NGESVLTFRDGARGAHPDETFSKGI VNPPESEFVAVVLPPEQADTCKAQWDTMADLLNQAGAPPTRSETVQYDAFSSP  
ESISLNVAGAI DPSEVDAAFFVLPDQEGFADLASPTETYDELKALANMGIYSQMAYFDRFRDAKIFYTRNVALGLL  
AAAGGVAFTTEHAMPGDADMFIGIDVSRSPEDGASGQINIAATATAVYKDGITLGHSSSTRPQLGEKLOSTDVDRD  
NAILGYQVVTGESPTHIVHRDGMFNEEDLPATEFLNEQGVYDIVEIRKQPQTRLLAVSDVQYDTPVKSIAAINQNE  
PRATVATFGAPEYLATRDGGGLPRPIQIERVAGETDIETLTRQVYLLSQSHIQVHNSTARLPITAYADQASTHATKG  
YLVQTFGAFESNVGFLGGSGGSGGSGGSGGSGSASGGGSGGSGKRPAAATKKAGQAKKKKGGSGSGATNFSLLKQAGDVEEN  
PGPAAA

### hTtAgo

NLS (SV40): aa 2-9

3X Flag: aa 15-36

hTtAgo: aa 65-749

NLS (Neoplasmin): aa 775-790

P2A cleavage peptide: aa 797-815

MPKKKRKVGSGGSDYKDHDGDYKDHDIDYKDDDDKGGGSGGSGTGGSGGSGGSGGSGGSGRPMNHLGKTEVFLNRF  
ALRPLNPEELRPWRLEVVLDPGGREEVYPLLAQVARRAGGVTVRMGDGLASWSPPEVLVLEGLTARMGQTYAYRLYP  
KRRRPLDPKDPGERSVLSALARRLLQERLRRLEGVWVEGLAVYRREHARGPGWRVLLGGAVLDLWVSDSGAFLLLEVDP  
YRILCEMSLEAWLAQGHPLPKRVRNAYDRRTWELLRLGEEDPKELPLPGGLSLLDYHASKGRLOGREGGRVAWVADPK  
DPRKPIPHLTGLLVPVLTLEDLHEEEGSLALSIPWEERRRRRTREIASWIGRRLGLGTPEAVRAQAYRLSIPKLMGRR  
VSKPADALRVGFYRAQETALALLRLDGAQGWPEFLRRALLRAFGASGASLRLHTLHAHPSQGLAFREALRKAKEEGVQ  
AVLVLTTPMAWEDRNRLKALLLREGLPSQILNVPLREEERHRWENALLGLLAKAGLQVVALSGAYPAELAVGFDAGGR  
ESFRFGGAACAVGGDGGHLLWTLPEAQAGERIQEVVWDLLEETLWAFRRKAGRLPSRVLLLRDGRVPQDEFALALEA  
LAREGIAYDLVSVRKS GGGRVYPVQGRADGLYVPLEDKTFLLLTVHRDFRGTTPRPLKLVHEAGDTPLEALAHQIFHL  
TRLYPASGFAPRPLPAPLHLADRLVKEVGRIGIRHLKEVDREKLFFVGGSGGSGGSGGSGGSGSASGGGSGGSGKRPAA  
T  
KKAGQAKKKKGGSGSGATNFSLLKQAGDVEENPGPAAA

**S1 Fig. Protein sequences of hNgAgo and hTtAgo used in this study.**
