# Supplementary material for: Unexpected binding behaviors of bacterial Argonautes in human cells cast doubts on their use as targetable gene regulators
Source: PubMed Central journal article supplement (PMC5870970; doi:10.1371/journal.pone.0193818), 2018-03-27
Supplement: pone.0193818.s003.pdf [file pone.0193818.s003.pdf]

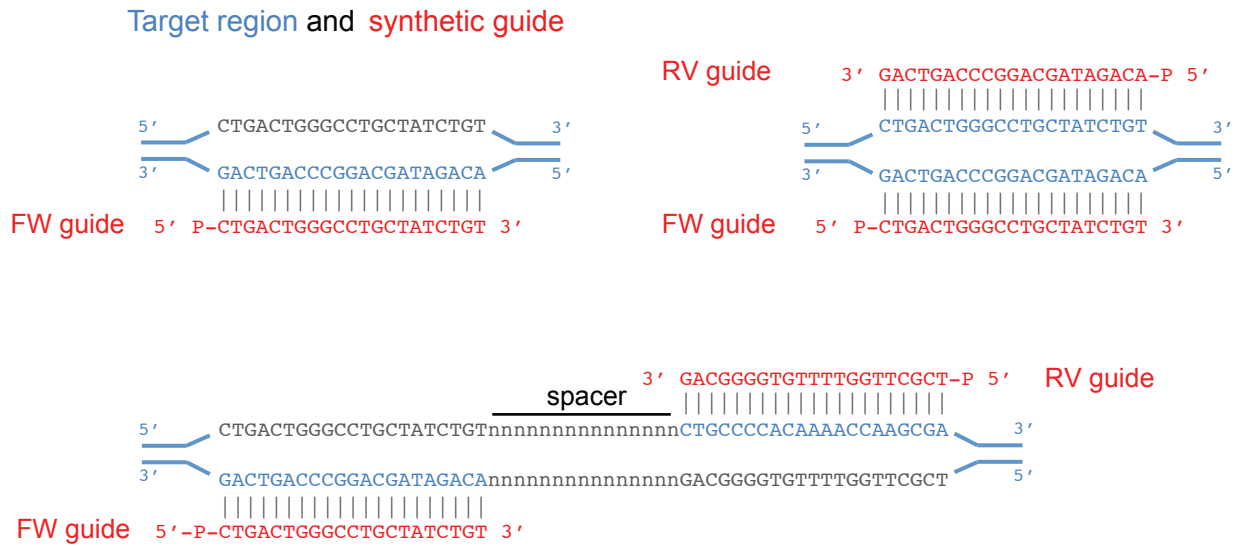

**S3 Fig. Design of hTtAgo guide DNAs.** Diagram illustrating the three different gDNA constellations that were tested: forward (FW) guide only, forward (FW) and reverse (RV) guides or forward (FW) and reverse (RV) guides separated by a 15-nt spacer sequence. The genomic *RPL13A* target site is indicated in blue and complementary ssDNA guides are indicated in red.
