# Supplementary material for: Unexpected binding behaviors of bacterial Argonautes in human cells cast doubts on their use as targetable gene regulators
Source: PubMed Central journal article supplement (PMC5870970; doi:10.1371/journal.pone.0193818), 2018-03-27
Supplement: pone.0193818.s004.pdf [file pone.0193818.s004.pdf]

**Supplementary Table S1:****List of oligonucleotide sequences for activity assay**

21-nt and 24-nt ss DNA guides were used for h7iAgo and hNgAgo targeting, respectively  
Target sites for 21-nt ss DNA guides are underlined

**FW guide and RV target according to Swarts et al. 2014**

| Oligo name        | Forward (5'-3')                                                                                               |
|-------------------|---------------------------------------------------------------------------------------------------------------|
| FW guide (21-nt)  | /5Phos/TGAGGTAGTAGGTTGTATAGT                                                                                  |
| FW guide (24-nt)  | /5Phos/GAGGTAGTAGGTTGTATAGTATAT                                                                               |
| RV target (98-nt) | TCGACTTTATATTTAAATAATTTAATATA <u>ACTATACAACCTACTACCTCGTATAAAATTTTAAATAAATAT</u> TGCATTCAAGCTTTTAATTTAATTTAAAT |

**RPL13A ss DNA guide and ss DNA target**

| Oligo name            | Forward (5'-3')                                                                                          |
|-----------------------|----------------------------------------------------------------------------------------------------------|
| RPL13A (21-nt)        | /5Phos/TCAGATAGCAGGCCAGTCAG                                                                              |
| RPL13A (t1G) (21-nt)  | /5Phos/CAGATAGCAGGCCAGTCAGA                                                                              |
| RPL13A (24-nt)        | /5Phos/CAGATAGCAGGCCAGTCAGAGGG                                                                           |
| RPL13A target (98-nt) | CCCATGGGCCACCTCAGTGGGGTGGGTGGGCATCCTTATGAGGCCCT <u>CTGACTGGGCTGCTATCTGT</u> CACCCAACAGGTATGCTGCCCCAAAAAC |
