# Supplementary material for: Unexpected binding behaviors of bacterial Argonautes in human cells cast doubts on their use as targetable gene regulators
Source: PubMed Central journal article supplement (PMC5870970; doi:10.1371/journal.pone.0193818), 2018-03-27
Supplement: pone.0193818.s005.pdf [file pone.0193818.s005.pdf]

## Supplementary Table S2:

### List of oligonucleotide sequences of guide DNAs and gRNA target sites

#### Oligonucleotide sequences of 21-nt guide DNAs (hTtAgo)

gDNAs are 5'-phosphorylated (5'-p)

#### Forward (FW) guides (5'-3')

|              |                            |
|--------------|----------------------------|
| RPL13A site1 | 5'-p-CAGAACGCTTCGACCAATGAA |
| RPL13A site2 | 5'-p-CTGACTGGGCCTGCTATCTGT |
| RAB1A site1  | 5'-p-ACTTTCCAACCCCTGAGTCGC |
| RAB1A site2  | 5'-p-CGAGCTGAGGACAGACAGTGC |
| NPAS1        | 5'-p-CAAGGCCTCAGGGTACAAGGT |
| NFE2L1       | 5'-p-CAGACCCAGTTCACAACCTG  |

#### Reverse (RV) guides (5'-3')

|              |                             |
|--------------|-----------------------------|
| RPL13A site1 | 5'-p-TTCATTGGTTCGAAGCGTTCTG |
| RPL13A site2 | 5'-p-ACAGATAGCAGGCCCAGTCAG  |
| RAB1A site1  | 5'-p-GCGACTCAGGGGTGGAAAGT   |
| RAB1A site2  | 5'-p-GCACTGTCTGTCCCTCAGCTCG |
| NPAS1        | 5'-p-ACCTTGTACCCTGAGGCCTTG  |
| NFE2L1       | 5'-p-CAGGTTGTGGAAGTGGGTCTG  |

#### 15-nt spaced Reverse (15-nt RV) guides (5'-3')

|              |                            |
|--------------|----------------------------|
| RPL13A site1 | 5'-p-TGACGCAACGCGGTTGCGCGG |
| RPL13A site2 | 5'-p-TCGCTTGGTTTTGTGGGGCAG |
| RAB1A site1  | 5'-p-TTTGCAGTGATTATTTATTCA |
| RAB1A site2  | 5'-p-GGCGCTTGGCGGGAAGCTGAG |
| NPAS1        | 5'-p-GGCTCCTGTATTCCAGGCAGC |
| NFE2L1       | 5'-p-CTTGGGGTGGATACCATAGCC |

#### Oligonucleotide sequences of 21-nt (hTtAgo) and 24-nt (hNgAgo) guide DNAs

gDNAs are 5'-phosphorylated

|                       |                               |
|-----------------------|-------------------------------|
| RPL13A site2 (hTtAgo) | 5'-p-TCAGATAGCAGGCCCAGTCAG    |
| RPL13A site2 (hNgAgo) | 5'-p-GTGACAGATAGCAGGCCCAGTCAG |
| HER2 (hTtAgo)         | 5'-p-TTTGTTGGAATGCAGTTGGAG    |
| HER2 (hNgAgo)         | 5'-p-AGACTTGTGGAATGCAGTTGGAG  |
| G5 (hNgAgo)           | 5'-p-CCTACCAGAATCGCCCAGTGGCTG |

#### Oligonucleotide sequences of gRNA target sites (SpCas9)

PAM sequence (5'-NGG-3') is underlined

|            |                                 |
|------------|---------------------------------|
| RPL13A 2-1 | CCTTATGAGGCCCTCTGACT <u>TGG</u> |
| RPL13A 2-2 | AGATAGCAGGCCCAGTCAG <u>AGG</u>  |
| HER2       | GTTGGAATGCAGTTGGAG <u>GGG</u>   |
