# Supplementary material for: Unexpected binding behaviors of bacterial Argonautes in human cells cast doubts on their use as targetable gene regulators
Source: PubMed Central journal article supplement (PMC5870970; doi:10.1371/journal.pone.0193818), 2018-03-27
Supplement: pone.0193818.s006.pdf [file pone.0193818.s006.pdf]

### Supplementary Table S3:

### List of oligonucleotide sequences for amplification of genomic target regions

#### Oligonucleotide sequences for indel analysis

| Oligo name   | Forward (5'-3')        |
|--------------|------------------------|
| RPL13A site1 | GAGATGAACAGCCCCTCAAA   |
| RPL13A site2 | ATGAGATGACTCCACATGCACT |
| RAB1A site1  | CCAAGATACTACTGGGGATG   |
| RAB1A site2  | CGAACCAGGAAATAGGGAAG   |
| NPAS1        | AGAGGCCAGCCTCACCAA     |
| NFE2L1       | TCCAGTTCACCATTCTGCTG   |

| Oligo name   | Reverse (5'-3')        |
|--------------|------------------------|
| RPL13A site1 | TGTCGCAGGGTTTCTTATCC   |
| RPL13A site2 | TGTAGGTAGTTGCGGAACATCA |
| RAB1A site1  | AGCAATGCAGTGTGCTTTTT   |
| RAB1A site2  | AAGTCCTAGCCAGCGAGTCA   |
| NPAS1        | GGAGGACTGGACACTGTGTGA  |
| NFE2L1       | CCAGGCATTTACCTCAGTGG   |

#### Oligonucleotide sequences for indel analysis

Barcodes at 5' end of Forward primer are underlined

| Oligo name          | Forward (5'-3')                    |
|---------------------|------------------------------------|
| HER2 Ampl-1 SEQ F   | <u>ATCAC</u> CGCGAAGAGAGGGAGAAAGTG |
| HER2 Ampl-2 SEQ F   | <u>CGATG</u> GCGAAGAGAGGGAGAAAGTG  |
| RPL13A Ampl-3 SEQ F | <u>TTAGG</u> TGACTCCACATGCACTACCA  |
| RPL13A Ampl-4 SEQ F | <u>TGACCT</u> GACTCCACATGCACTACCA  |

| Oligo name        | Reverse (5'-3')      |
|-------------------|----------------------|
| HER2 Ampl SEQ R   | GGGCTCCCCTGGTTTCTC   |
| RPL13A Ampl SEQ R | GGCATAGCTCACCTTGTCTG |

#### Oligonucleotide sequences for ChIP-qPCR and ChIP-PCR

| Oligo name   | Forward (5'-3')       |
|--------------|-----------------------|
| RPL13A PCR-F | GGTGGGTGGGCATCCTTAT   |
| GAPDH PCR-F  | CACCGTCAAGGCTGAGAACG  |
| G5 PCR-F     | GCAATCAGGCCTACCAGAAT  |
| HER2 PCR-F   | TTGGAATGCAGTTGGAGGGG  |
| EPCAM PCR-F  | CCCAACTCCC GGGCGGTGAC |

| Oligo name   | Reverse (5'-3')       |
|--------------|-----------------------|
| RPL13A PCR-R | CTGGCCTCGCTTGGTTTT    |
| GAPDH PCR-R  | ATACCCAAGGGAGCCACACC  |
| G5 PCR-R     | GGGATTGGAGTAGACGGTCA  |
| HER2 PCR-R   | GGTTTCTCCGGTCCCAATGG  |
| EPCAM PCR-R  | GGGTCCGCGTCCGGGAGGACA |
