# Supplementary material for: Unexpected binding behaviors of bacterial Argonautes in human cells cast doubts on their use as targetable gene regulators
Source: PubMed Central journal article supplement (PMC5870970; doi:10.1371/journal.pone.0193818), 2018-03-27
Supplement: pone.0193818.s007.pdf [file pone.0193818.s007.pdf]

**Supplementary Table S4:  
Indel analysis of PCR amplified genomic target sites using 5'-phosphorylated guide DNAs**

**gDNA: /5Phos/NNNNNNNNNNNNNNNNNNNNNNNN**

**% Indels = (Indels+Deletions)/Reads\*100**

**NFE2L1**

| Cell type | Treatment                  | % Indel | # Reads | Insertions | Deletions | Substitutions | % Substitutions |
|-----------|----------------------------|---------|---------|------------|-----------|---------------|-----------------|
| 293       | Untreated                  | 0.00    | 9,756   | 0          | 0         | 47            | 0.48            |
|           | hTtAgo                     | 0.00    | 28,628  | 0          | 0         | 154           | 0.54            |
|           | hTtAgo / FW gDNA           | 0.00    | 28,955  | 0          | 0         | 123           | 0.42            |
|           | hTtAgo / FW+RV gDNA        | 0.00    | 13,293  | 0          | 0         | 80            | 0.60            |
|           | hTtAgo / FW+ 15-nt RV gDNA | 0.00    | 20,755  | 0          | 0         | 91            | 0.44            |
| Hela      | Untreated                  | 0.01    | 14,331  | 1          | 1         | 76            | 0.53            |
|           | hTtAgo                     | 0.00    | 18,014  | 0          | 0         | 92            | 0.51            |
|           | hTtAgo / FW gDNA           | 0.00    | 10,173  | 0          | 0         | 53            | 0.52            |
|           | hTtAgo / FW+RV gDNA        | 0.01    | 8,947   | 0          | 1         | 43            | 0.48            |
|           | hTtAgo / FW+ 15-nt RV gDNA | 0.00    | 6,841   | 0          | 0         | 44            | 0.64            |

**NPAS1**

| Cell type | Treatment                  | % Indel | # Reads | Insertions | Deletions | Substitutions | % Substitutions |
|-----------|----------------------------|---------|---------|------------|-----------|---------------|-----------------|
| 293       | Untreated                  | 0.01    | 12,605  | 0          | 1         | 82            | 0.65            |
|           | hTtAgo                     | 0.00    | 31,862  | 0          | 1         | 213           | 0.67            |
|           | hTtAgo / FW gDNA           | 0.00    | 44,133  | 0          | 1         | 319           | 0.72            |
|           | hTtAgo / FW+RV gDNA        | 0.01    | 15,995  | 0          | 1         | 104           | 0.65            |
|           | hTtAgo / FW+ 15-nt RV gDNA | 0.00    | 53,417  | 0          | 1         | 392           | 0.73            |
| Hela      | Untreated                  | 0.01    | 15,641  | 0          | 1         | 110           | 0.70            |
|           | hTtAgo                     | 0.00    | 23,258  | 0          | 0         | 189           | 0.81            |
|           | hTtAgo / FW gDNA           | 0.00    | 28,163  | 0          | 0         | 195           | 0.69            |
|           | hTtAgo / FW+RV gDNA        | 0.01    | 18,405  | 0          | 1         | 130           | 0.71            |
|           | hTtAgo / FW+ 15-nt RV gDNA | 0.00    | 20,408  | 0          | 0         | 120           | 0.59            |

**RAB1A site1**

| Cell type | Treatment                  | % Indel | # Reads | Insertions | Deletions | Substitutions | % Substitutions |
|-----------|----------------------------|---------|---------|------------|-----------|---------------|-----------------|
| 293       | Untreated                  | 0.01    | 15,716  | 1          | 0         | 173           | 1.10            |
|           | hTtAgo                     | 0.00    | 34,405  | 0          | 1         | 287           | 0.83            |
|           | hTtAgo / FW gDNA           | 0.00    | 46,837  | 0          | 2         | 422           | 0.90            |
|           | hTtAgo / FW+RV gDNA        | 0.00    | 26,199  | 0          | 1         | 258           | 0.98            |
|           | hTtAgo / FW+ 15-nt RV gDNA | 0.01    | 49,392  | 0          | 5         | 525           | 1.06            |
| Hela      | Untreated                  | 0.01    | 25,129  | 0          | 2         | 253           | 1.01            |
|           | hTtAgo                     | 0.01    | 30,950  | 0          | 2         | 248           | 0.80            |
|           | hTtAgo / FW gDNA           | 0.00    | 29,750  | 0          | 0         | 249           | 0.84            |
|           | hTtAgo / FW+RV gDNA        | 0.00    | 20,158  | 0          | 1         | 212           | 1.05            |
|           | hTtAgo / FW+ 15-nt RV gDNA | 0.00    | 19,748  | 0          | 0         | 193           | 0.98            |

**RAB1A site2**

| Cell type | Treatment                  | % Indel | # Reads | Insertions | Deletions | Substitutions | % Substitutions |
|-----------|----------------------------|---------|---------|------------|-----------|---------------|-----------------|
| 293       | Untreated                  | 0.000   | 20,581  | 0          | 0         | 149           | 0.72            |
|           | hTtAgo                     | 0.000   | 26,958  | 0          | 0         | 162           | 0.60            |
|           | hTtAgo / FW gDNA           | 0.000   | 35,014  | 0          | 0         | 208           | 0.59            |
|           | hTtAgo / FW+RV gDNA        | 0.000   | 26,282  | 0          | 0         | 162           | 0.62            |
|           | hTtAgo / FW+ 15-nt RV gDNA | 0.000   | 43,979  | 0          | 0         | 285           | 0.65            |
| Hela      | Untreated                  | 0.000   | 40,071  | 0          | 0         | 234           | 0.58            |
|           | hTtAgo                     | 0.000   | 37,720  | 0          | 0         | 223           | 0.59            |
|           | hTtAgo / FW gDNA           | 0.000   | 49,148  | 0          | 0         | 303           | 0.62            |
|           | hTtAgo / FW+RV gDNA        | 0.000   | 39,481  | 0          | 0         | 242           | 0.61            |
|           | hTtAgo / FW+ 15-nt RV gDNA | 0.000   | 49,554  | 0          | 0         | 369           | 0.74            |

**RPL13A site1**

| Cell type | Treatment                  | % Indel | # Reads | Insertions | Deletions | Substitutions | % Substitutions |
|-----------|----------------------------|---------|---------|------------|-----------|---------------|-----------------|
| 293       | Untreated                  | 0.010   | 10,003  | 0          | 1         | 43            | 0.43            |
|           | hTtAgo                     | 0.000   | 22,616  | 0          | 0         | 117           | 0.52            |
|           | hTtAgo / FW gDNA           | 0.004   | 22,324  | 0          | 1         | 90            | 0.40            |
|           | hTtAgo / FW+RV gDNA        | 0.000   | 10,905  | 0          | 0         | 41            | 0.38            |
|           | hTtAgo / FW+ 15-nt RV gDNA | 0.000   | 28,859  | 0          | 0         | 128           | 0.44            |
| Hela      | Untreated                  | 0.006   | 15,987  | 0          | 1         | 71            | 0.44            |
|           | hTtAgo                     | 0.000   | 15,324  | 0          | 0         | 70            | 0.46            |
|           | hTtAgo / FW gDNA           | 0.006   | 16,840  | 0          | 1         | 77            | 0.46            |
|           | hTtAgo / FW+RV gDNA        | 0.006   | 17,919  | 0          | 1         | 73            | 0.41            |
|           | hTtAgo / FW+ 15-nt RV gDNA | 0.000   | 13,073  | 0          | 0         | 46            | 0.35            |

**RPL13A site2**

| Cell type | Treatment                  | % Indel | # Reads | Insertions | Deletions | Substitutions | % Substitutions |
|-----------|----------------------------|---------|---------|------------|-----------|---------------|-----------------|
| 293       | Untreated                  | 0.000   | 6,432   | 0          | 0         | 28            | 0.44            |
|           | hTtAgo                     | 0.000   | 15,418  | 0          | 0         | 55            | 0.36            |
|           | hTtAgo / FW gDNA           | 0.000   | 23,771  | 0          | 0         | 111           | 0.47            |
|           | hTtAgo / FW+RV gDNA        | 0.000   | 12,123  | 0          | 0         | 53            | 0.44            |
|           | hTtAgo / FW+ 15-nt RV gDNA | 0.000   | 23,440  | 0          | 0         | 103           | 0.44            |
| Hela      | Untreated                  | 0.000   | 15,154  | 0          | 0         | 75            | 0.49            |
|           | hTtAgo                     | 0.000   | 15,278  | 0          | 0         | 66            | 0.43            |
|           | hTtAgo / FW gDNA           | 0.007   | 14,771  | 1          | 0         | 61            | 0.41            |
|           | hTtAgo / FW+RV gDNA        | 0.000   | 15,136  | 0          | 0         | 70            | 0.46            |
|           | hTtAgo / FW+ 15-nt RV gDNA | 0.000   | 12,009  | 0          | 0         | 60            | 0.50            |
