# Supplementary material for: Unexpected binding behaviors of bacterial Argonautes in human cells cast doubts on their use as targetable gene regulators
Source: PubMed Central journal article supplement (PMC5870970; doi:10.1371/journal.pone.0193818), 2018-03-27
Supplement: pone.0193818.s008.pdf [file pone.0193818.s008.pdf]

**Supplementary Table S5:  
Indel analysis of amplified genomic targets using 5'-phosphorylated gDNAs with phosphorothioate modifications**

**gDNA: /5Phos/N\*N\*NNNNNNNNNNNNNNNN\*N\*N**

**\* phosphorothioate linkage**

**% Indels = (Indels+Deletions)/Reads\*100**

**NFE2L1**

| Cell type | Treatment                  | % Indel | # Reads | Insertions | Deletions | Substitutions | % Substitutions |
|-----------|----------------------------|---------|---------|------------|-----------|---------------|-----------------|
| 293       | Untreated                  | 0.00    | 9,756   | 0          | 0         | 47            | 0.48            |
|           | hTtAgo                     | 0.00    | 28,628  | 0          | 0         | 154           | 0.54            |
|           | hTtAgo / FW gDNA           | 0.00    | 13,851  | 0          | 0         | 54            | 0.39            |
|           | hTtAgo / FW+RV gDNA        | 0.00    | 11,732  | 0          | 0         | 53            | 0.45            |
|           | hTtAgo / FW+ 15-nt RV gDNA | 0.00    | 10,813  | 0          | 0         | 71            | 0.66            |

**NPAS1**

| Cell type | Treatment                  | % Indel | # Reads | Insertions | Deletions | Substitutions | % Substitutions |
|-----------|----------------------------|---------|---------|------------|-----------|---------------|-----------------|
| 293       | Untreated                  | 0.01    | 12,605  | 0          | 1         | 82            | 0.65            |
|           | hTtAgo                     | 0.00    | 31,862  | 0          | 1         | 213           | 0.67            |
|           | hTtAgo / FW gDNA           | 0.00    | 18,432  | 0          | 0         | 119           | 0.65            |
|           | hTtAgo / FW+RV gDNA        | 0.01    | 18,890  | 0          | 1         | 118           | 0.62            |
|           | hTtAgo / FW+ 15-nt RV gDNA | 0.01    | 18,432  | 0          | 1         | 126           | 0.68            |

**RAB1A site1**

| Cell type | Treatment                  | % Indel | # Reads | Insertions | Deletions | Substitutions | % Substitutions |
|-----------|----------------------------|---------|---------|------------|-----------|---------------|-----------------|
| 293       | Untreated                  | 0.01    | 15,716  | 1          | 0         | 173           | 1.10            |
|           | hTtAgo                     | 0.00    | 34,405  | 0          | 1         | 287           | 0.83            |
|           | hTtAgo / FW gDNA           | 0.01    | 27,472  | 0          | 3         | 254           | 0.92            |
|           | hTtAgo / FW+RV gDNA        | 0.00    | 20,193  | 0          | 0         | 162           | 0.80            |
|           | hTtAgo / FW+ 15-nt RV gDNA | 0.00    | 22,219  | 0          | 1         | 191           | 0.86            |

**RAB1A site2**

| Cell type | Treatment                  | % Indel | # Reads | Insertions | Deletions | Substitutions | % Substitutions |
|-----------|----------------------------|---------|---------|------------|-----------|---------------|-----------------|
| 293       | Untreated                  | 0.00    | 20,581  | 0          | 0         | 149           | 0.72            |
|           | hTtAgo                     | 0.00    | 26,958  | 0          | 0         | 162           | 0.60            |
|           | hTtAgo / FW gDNA           | 0.00    | 16,533  | 0          | 0         | 104           | 0.63            |
|           | hTtAgo / FW+RV gDNA        | 0.00    | 15,114  | 0          | 0         | 92            | 0.61            |
|           | hTtAgo / FW+ 15-nt RV gDNA | 0.00    | 20,802  | 0          | 1         | 135           | 0.65            |
| Hela      | Untreated                  | 0.00    | 40,071  | 0          | 0         | 234           | 0.58            |
|           | hTtAgo                     | 0.00    | 37,720  | 0          | 0         | 223           | 0.59            |
|           | hTtAgo / FW gDNA           | 0.00    | 27,775  | 0          | 0         | 155           | 0.56            |
|           | hTtAgo / FW+RV gDNA        | 0.00    | 23,040  | 0          | 0         | 141           | 0.61            |
|           | hTtAgo / FW+ 15-nt RV gDNA | 0.00    | 37,893  | 0          | 1         | 181           | 0.48            |

**RPL13A site1**

| Cell type | Treatment                  | % Indel | # Reads | Insertions | Deletions | Substitutions | % Substitutions |
|-----------|----------------------------|---------|---------|------------|-----------|---------------|-----------------|
| 293       | Untreated                  | 0.01    | 10,003  | 0          | 1         | 43            | 0.43            |
|           | hTtAgo                     | 0.00    | 22,616  | 0          | 0         | 117           | 0.52            |
|           | hTtAgo / FW gDNA           | 0.01    | 9,753   | 0          | 1         | 47            | 0.48            |
|           | hTtAgo / FW+RV gDNA        | 0.01    | 9,011   | 0          | 1         | 38            | 0.42            |
|           | hTtAgo / FW+ 15-nt RV gDNA | 0.00    | 7,130   | 0          | 0         | 39            | 0.55            |
| Hela      | Untreated                  | 0.01    | 15,987  | 0          | 1         | 71            | 0.44            |
|           | hTtAgo                     | 0.00    | 15,324  | 0          | 0         | 70            | 0.46            |
|           | hTtAgo / FW gDNA           | 0.03    | 10,805  | 0          | 3         | 55            | 0.51            |
|           | hTtAgo / FW+RV gDNA        | 0.03    | 8,703   | 0          | 3         | 31            | 0.36            |
|           | hTtAgo / FW+ 15-nt RV gDNA | 0.01    | 13,238  | 0          | 1         | 61            | 0.46            |

**RPL13A site2**

| <b>Cell type</b> | <b>Treatment</b>           | <b>% Indel</b> | <b># Reads</b> | <b>Insertions</b> | <b>Deletions</b> | <b>Substitutions</b> | <b>% Substitutions</b> |
|------------------|----------------------------|----------------|----------------|-------------------|------------------|----------------------|------------------------|
| 293              | Untreated                  | 0.00           | 6,432          | 0                 | 0                | 28                   | 0.44                   |
|                  | hTtAgo                     | 0.00           | 15,418         | 0                 | 0                | 55                   | 0.36                   |
|                  | hTtAgo / FW gDNA           | 0.00           | 10,567         | 0                 | 0                | 44                   | 0.42                   |
|                  | hTtAgo / FW+RV gDNA        | 0.00           | 7,973          | 0                 | 0                | 31                   | 0.39                   |
|                  | hTtAgo / FW+ 15-nt RV gDNA | 0.00           | 9,244          | 0                 | 0                | 36                   | 0.39                   |
| Hela             | Untreated                  | 0.00           | 15,154         | 0                 | 0                | 75                   | 0.49                   |
|                  | hTtAgo                     | 0.00           | 15,278         | 0                 | 0                | 66                   | 0.43                   |
|                  | hTtAgo / FW gDNA           | 0.00           | 13,756         | 0                 | 0                | 52                   | 0.38                   |
|                  | hTtAgo / FW+RV gDNA        | 0.00           | 13,253         | 0                 | 0                | 52                   | 0.39                   |
|                  | hTtAgo / FW+ 15-nt RV gDNA | 0.00           | 17,830         | 0                 | 0                | 74                   | 0.42                   |
