# Supplementary material for: Unexpected binding behaviors of bacterial Argonautes in human cells cast doubts on their use as targetable gene regulators
Source: PubMed Central journal article supplement (PMC5870970; doi:10.1371/journal.pone.0193818), 2018-03-27
Supplement: pone.0193818.s009.pdf [file pone.0193818.s009.pdf]

**Supplementary Table S6:**

**Indel analysis of amplified genomic target sites comparing cleavage ability of RNA-guided SpCas9 and DNA-guided TtAgo and NgAgo in HeK293-c18 cells.**

**% Indels = (Indels+Deletions)/Reads\*100**

| Target locus | Expressed protein | gDNA/gRNA | % Indel | # Reads | Insertions | Deletions | Substitutions | % Substitutions |
|--------------|-------------------|-----------|---------|---------|------------|-----------|---------------|-----------------|
| Her2         | mCherry           | -         | 0.07    | 15,248  | 3          | 7         | 73            | 0.48            |
|              | Cas9              | empty     | 0.05    | 6,139   | 1          | 2         | 31            | 0.50            |
|              | Cas9              | gRNA      | 39.88   | 7,525   | 578        | 2423      | 118           | 1.57            |
|              | TtAgo             | -         | 0.08    | 10,533  | 4          | 4         | 18            | 0.17            |
|              | TtAgo             | gDNA      | 0.00    | 12,059  | 0          | 0         | 19            | 0.16            |
|              | TtAgo             | 2XgDNA    | 0.01    | 7,637   | 0          | 1         | 13            | 0.17            |
|              | NgAgo             | -         | 0.01    | 9,226   | 0          | 1         | 14            | 0.15            |
|              | NgAgo             | gDNA      | 0.01    | 20,421  | 2          | 1         | 31            | 0.15            |
|              | NgAgo             | 2XgDNA    | 0.03    | 15,440  | 1          | 3         | 19            | 0.12            |
| RPL13A       | mCherry           | -         | 0.00    | 6,264   | 0          | 0         | 17            | 0.27            |
|              | Cas9              | empty     | 0.00    | 7,145   | 0          | 0         | 23            | 0.32            |
|              | Cas9              | gRNA2-1   | 25.01   | 6,585   | 1464       | 183       | 32            | 0.49            |
|              | Cas9              | gRNA2-2   | 43.17   | 5,978   | 2292       | 289       | 35            | 0.59            |
|              | TtAgo             | -         | 0.00    | 8,177   | 0          | 0         | 29            | 0.35            |
|              | TtAgo             | gDNA      | 0.00    | 4,556   | 0          | 0         | 8             | 0.18            |
|              | TtAgo             | 2XgDNA    | 0.00    | 7,446   | 0          | 0         | 28            | 0.38            |
|              | NgAgo             | -         | 0.02    | 6,457   | 0          | 1         | 25            | 0.39            |
|              | NgAgo             | gDNA      | 0.00    | 8,644   | 0          | 0         | 30            | 0.35            |
| NgAgo        | 2XgDNA            | 0.00      | 12,466  | 0       | 0          | 53        | 0.43          |                 |
